# Supplementary material
Source: PubMed Central journal article supplement (PMC8390793)

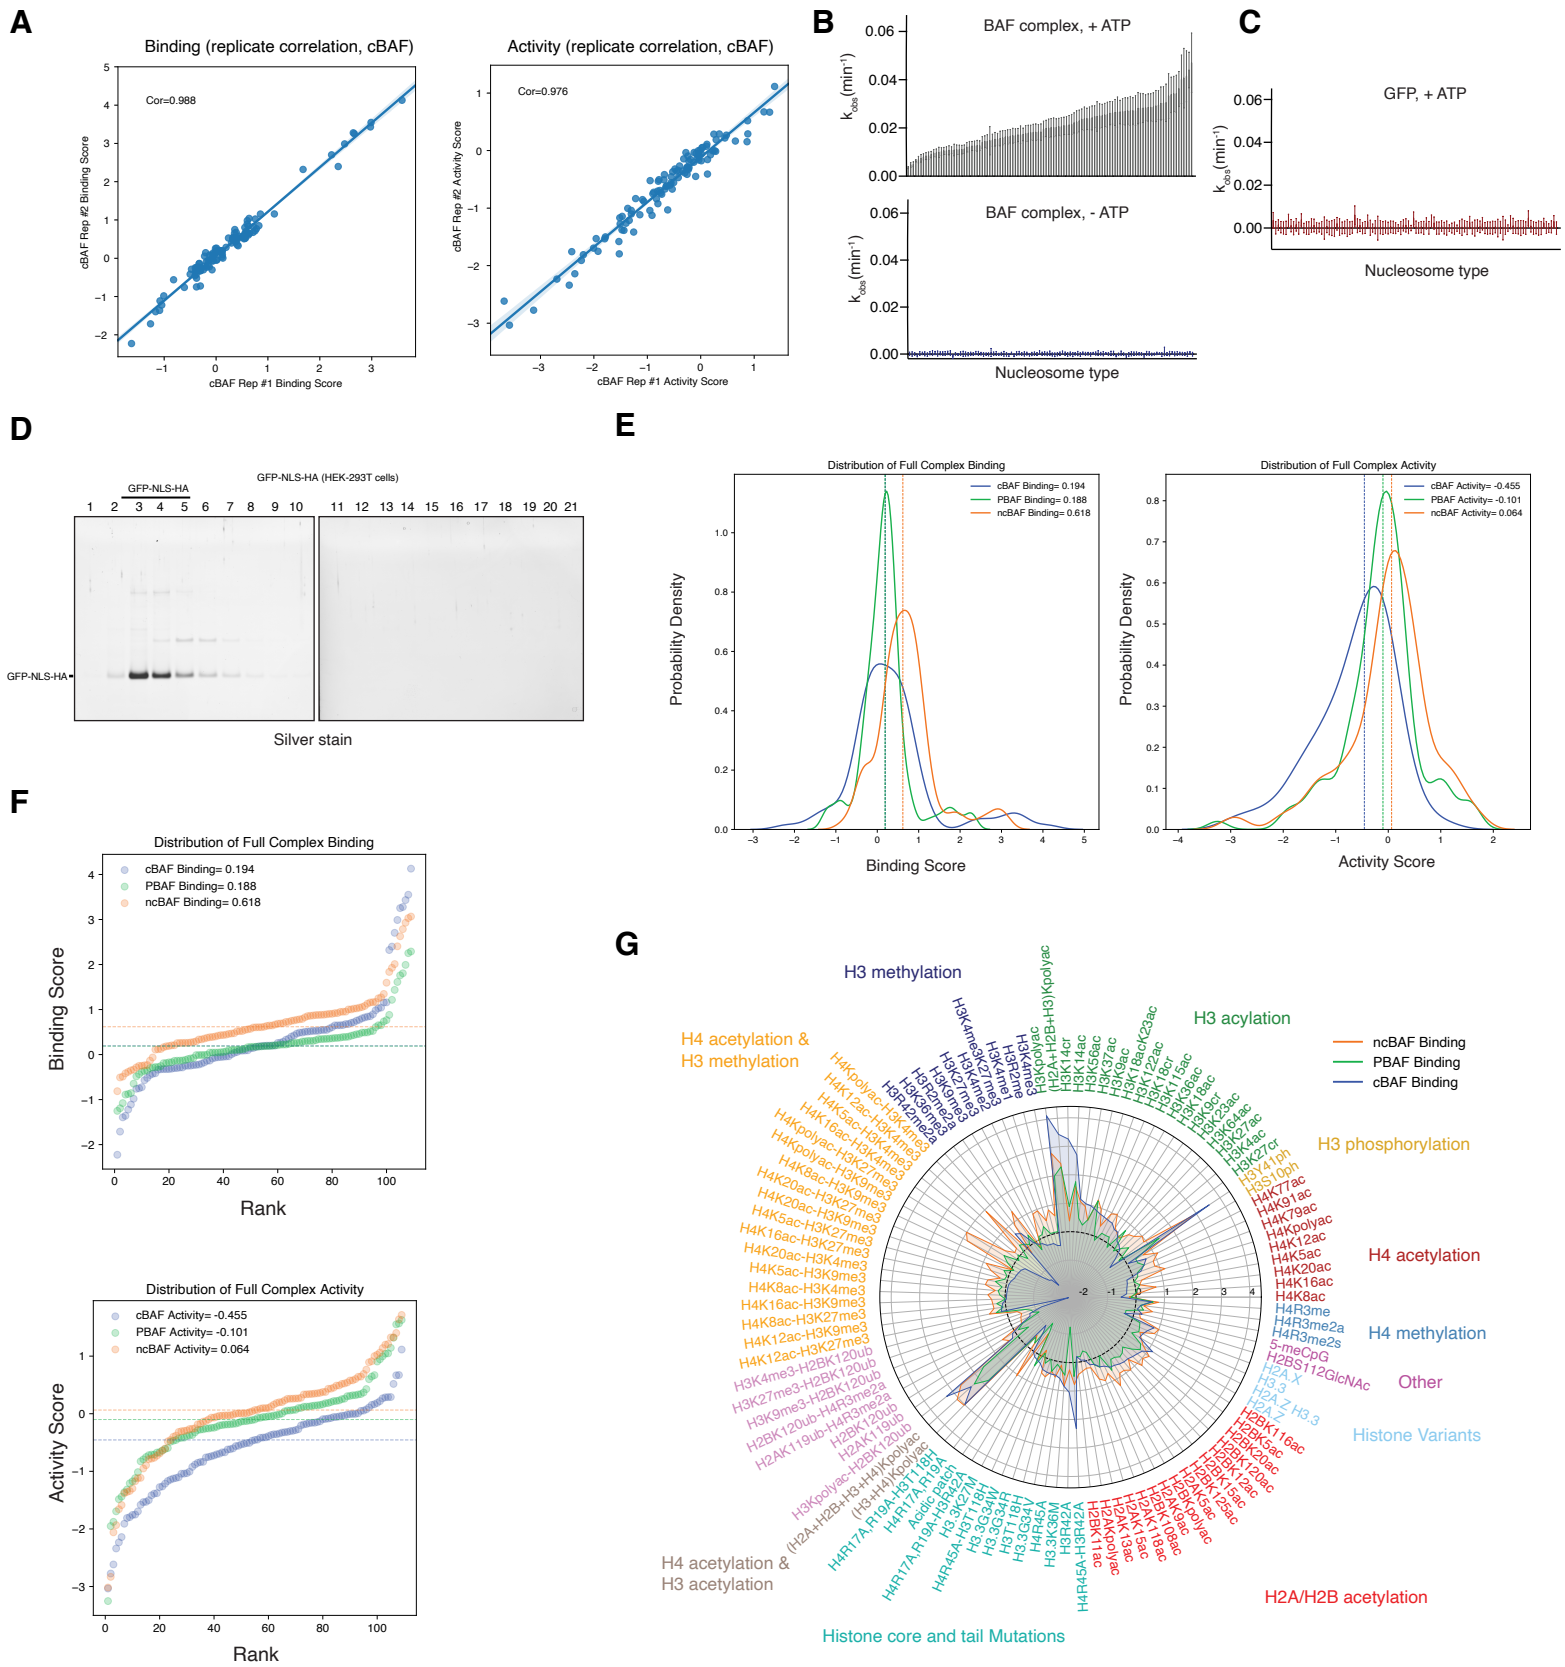

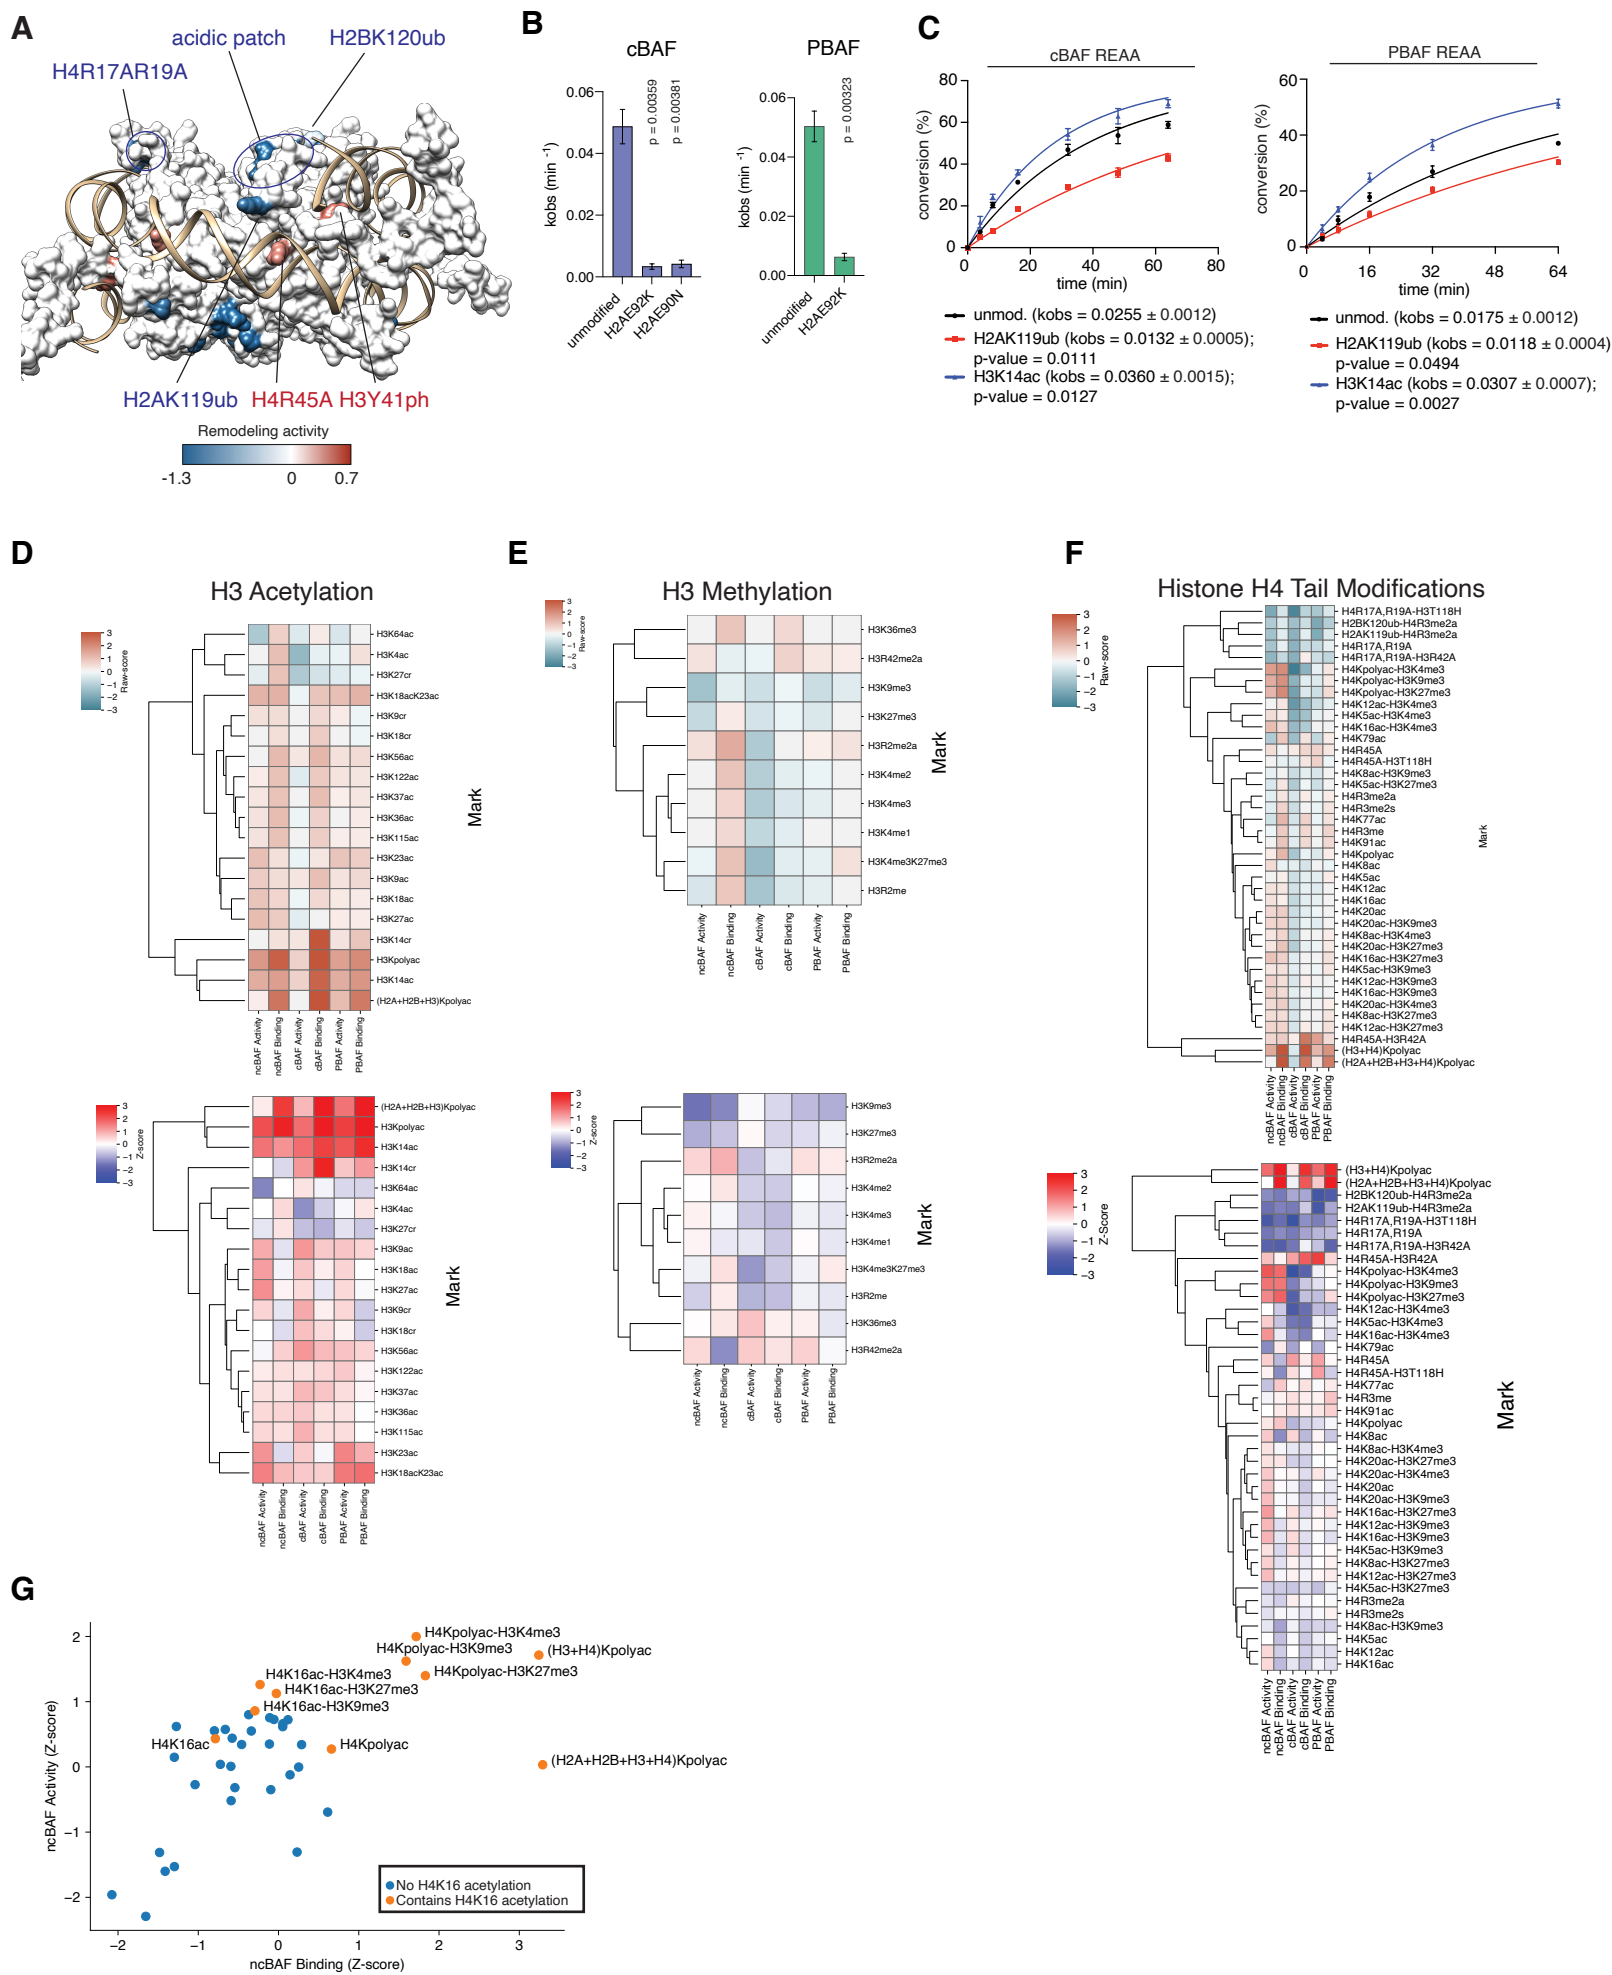

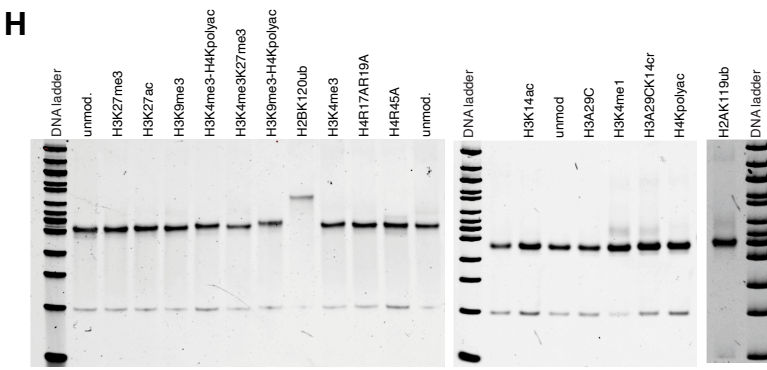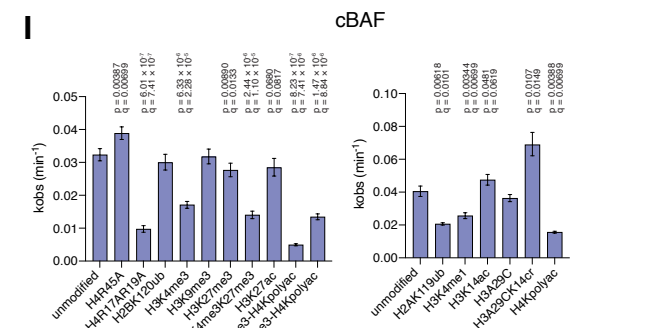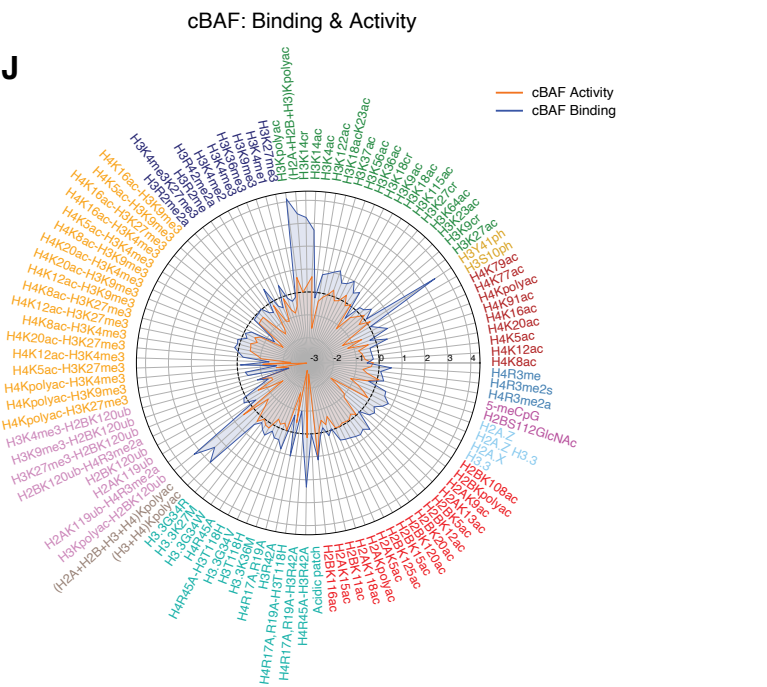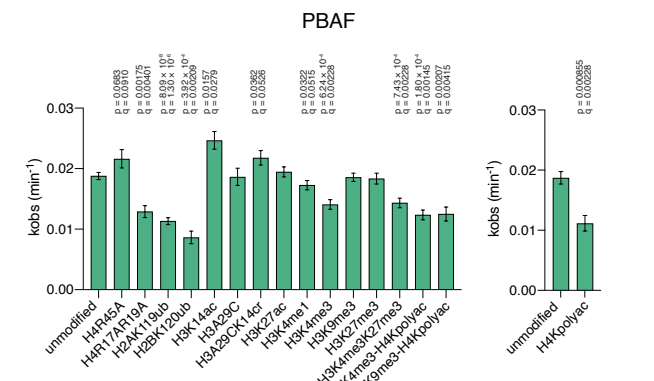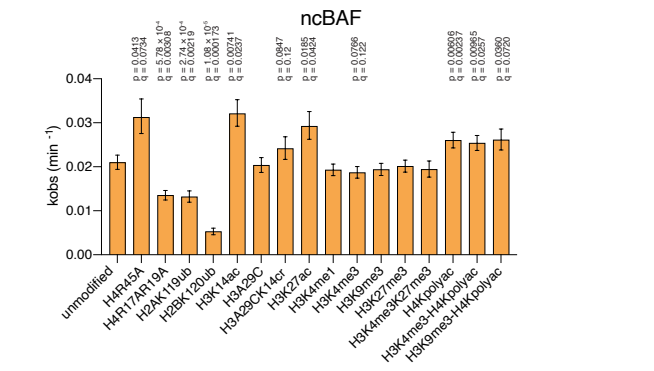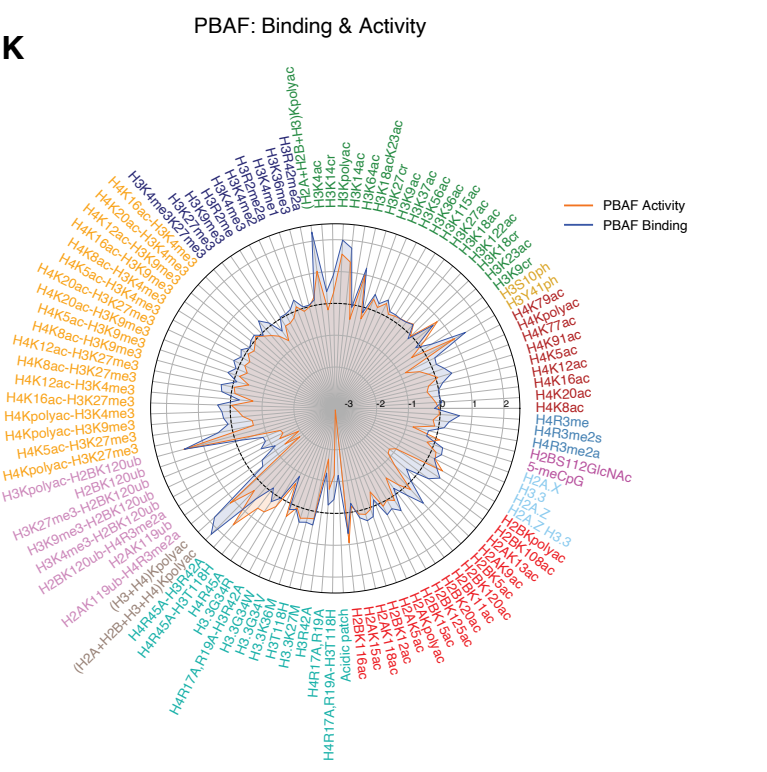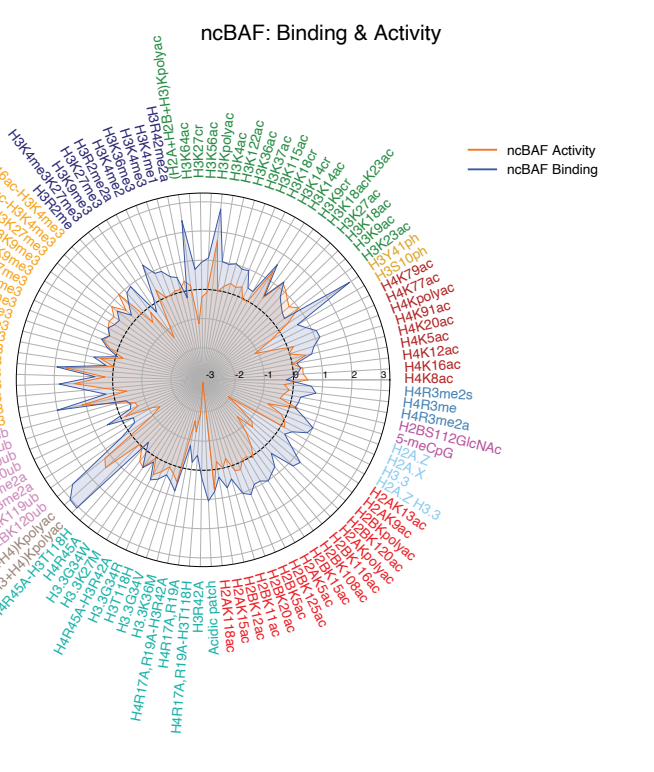

**A**

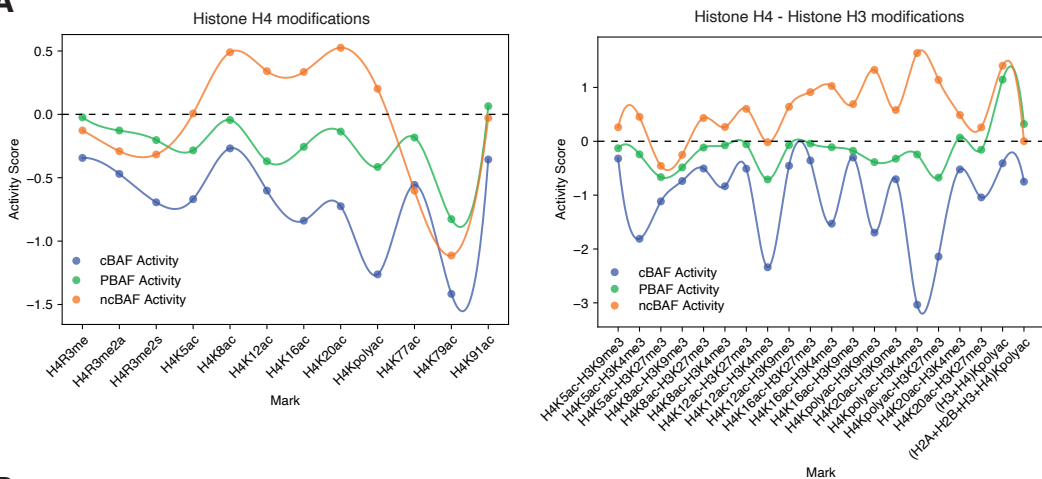

**B**

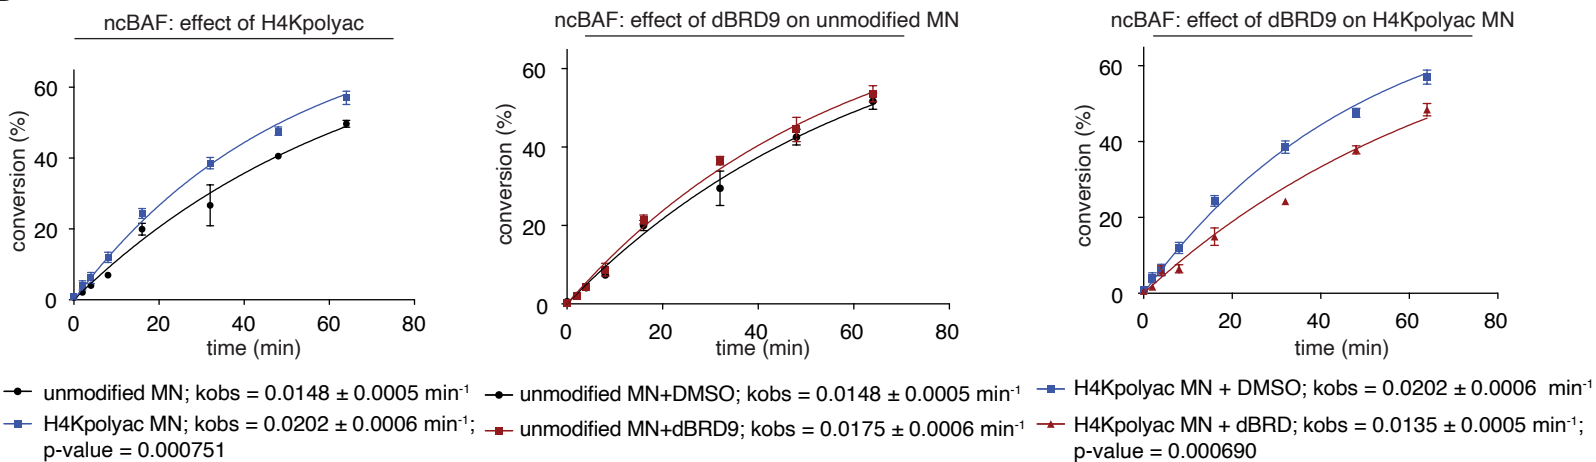

**C**

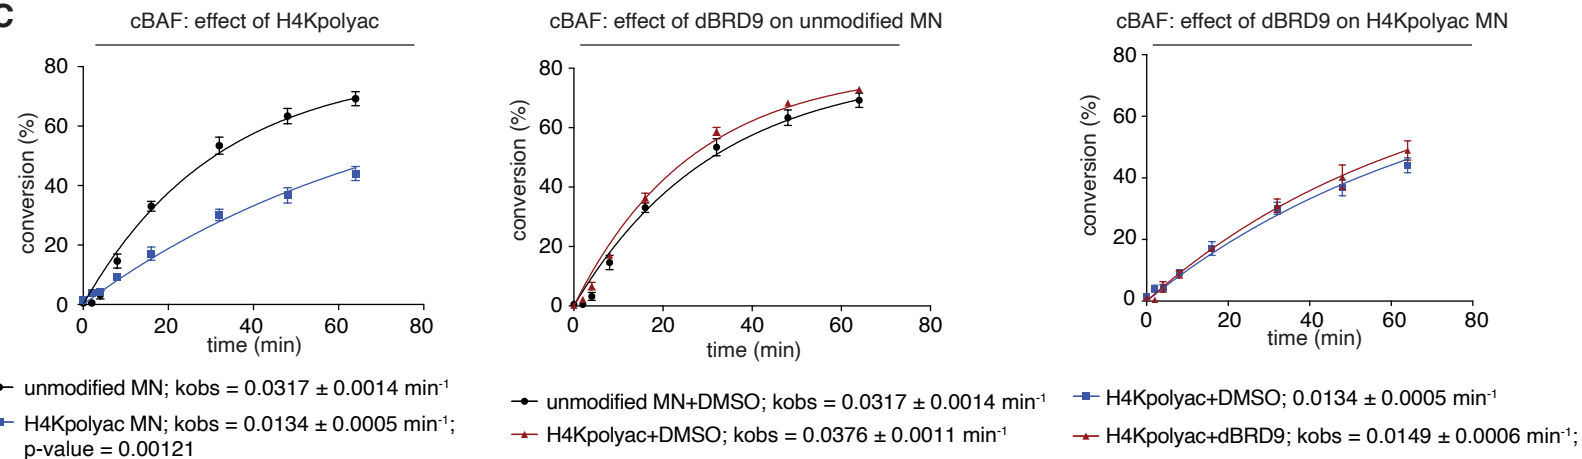

**D**

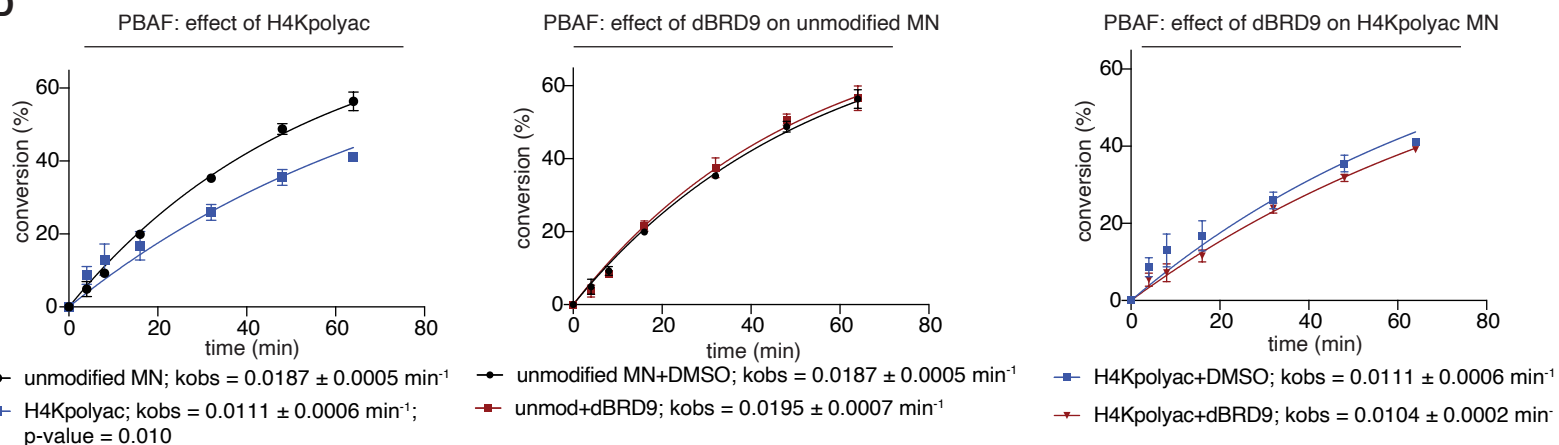

**E**

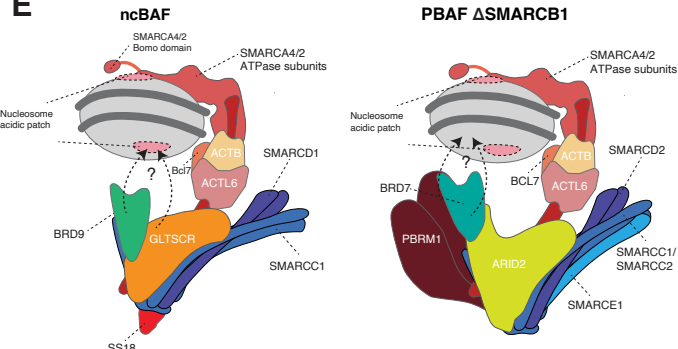

HA- SMARCD2 (SMARCB1-/- HEK-293T cells)

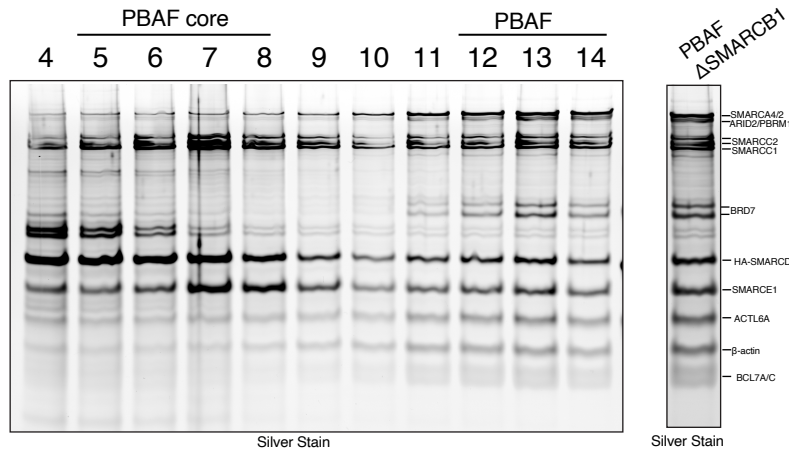

**F**

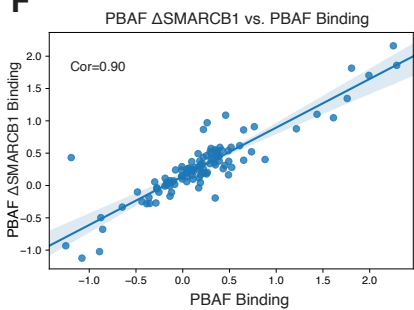

**G**

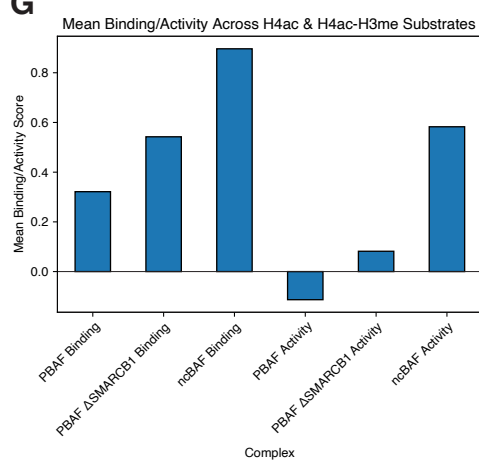

**H**

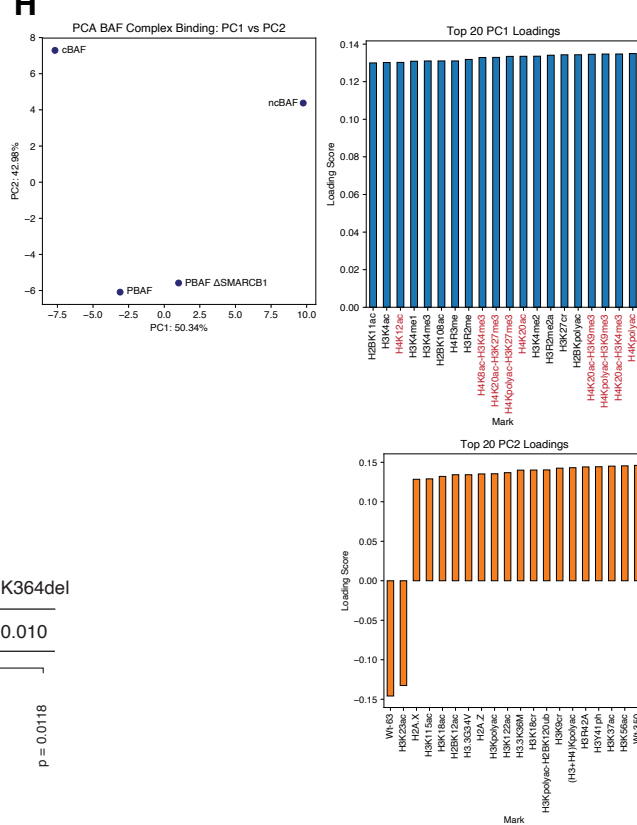

**I**

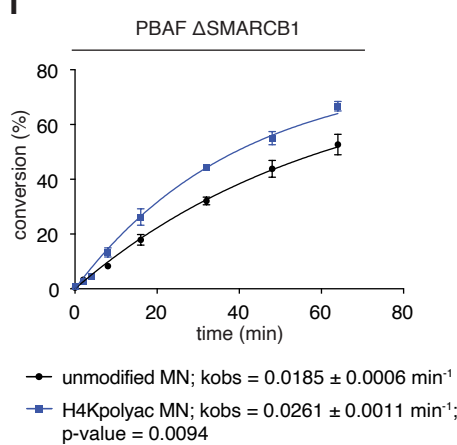

**J**

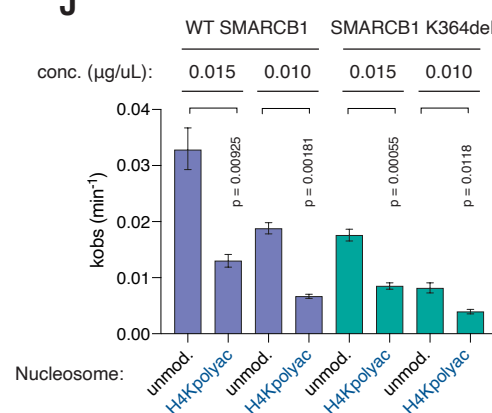

**A**

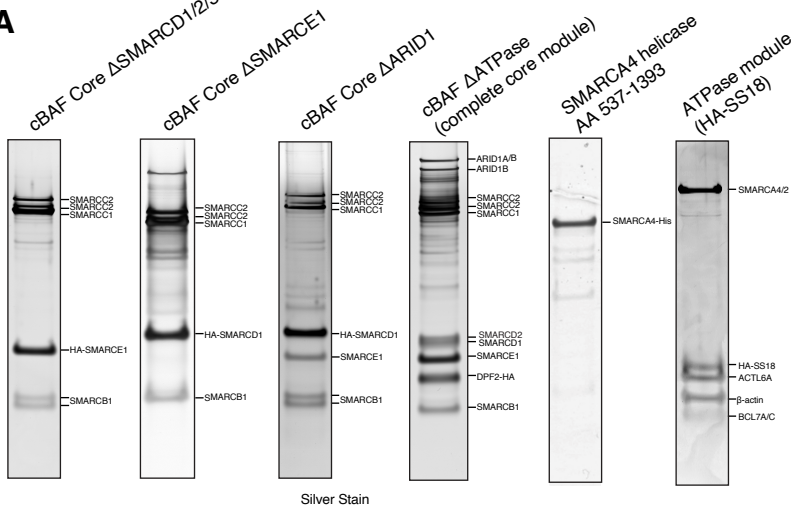

Silver Stain

**B**

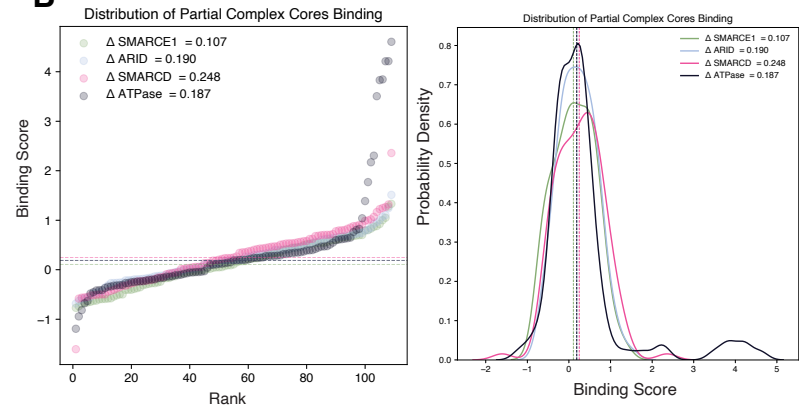

**C**

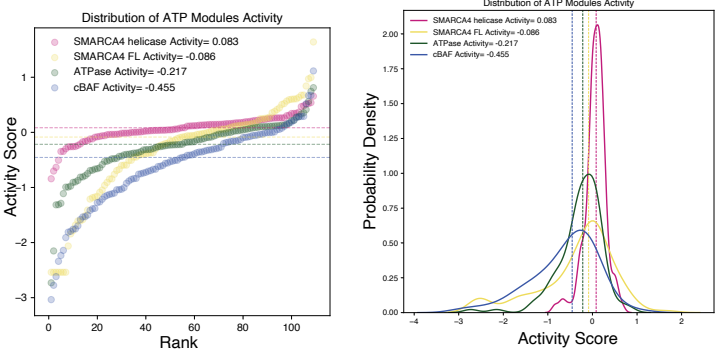

**D**

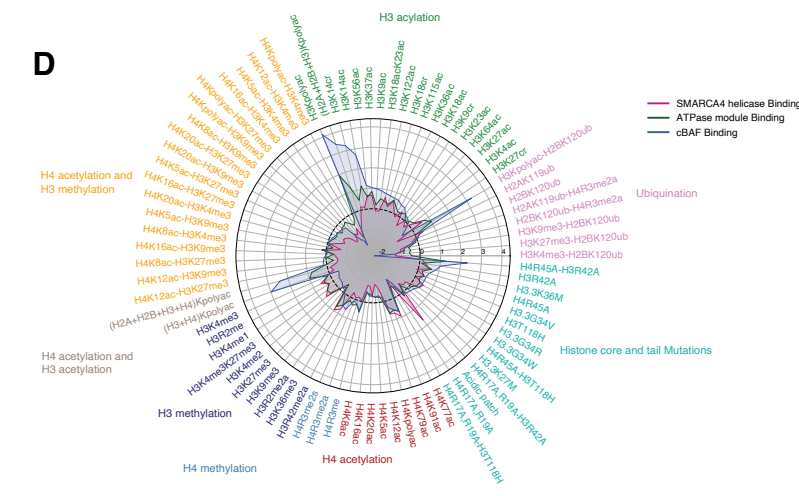

**E**

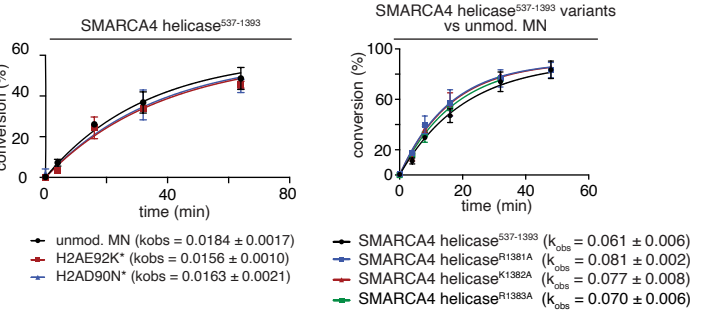

**F**

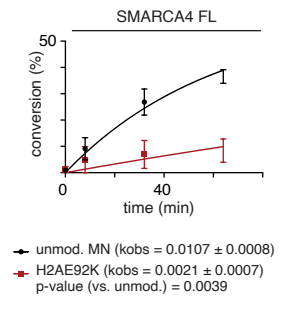

**G**

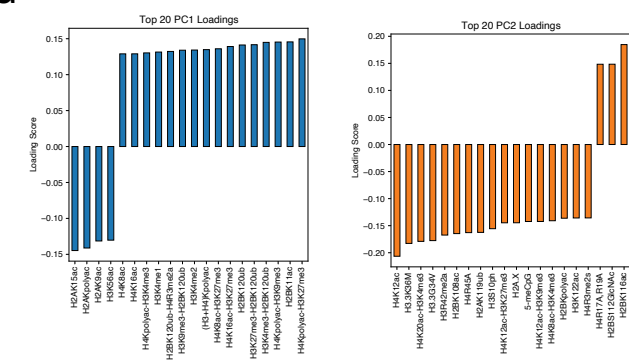

**H**

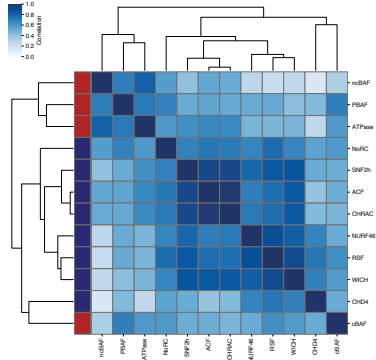

**I**

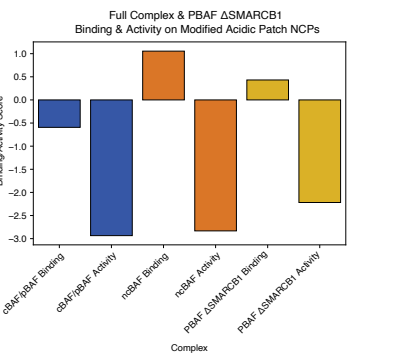

Supplement: NIHMS1725985-supplement-Supplemental_figures.pdf [file NIHMS1725985-supplement-Supplemental_figures.pdf]
